# Supplementary material
Source: publisher figshare collection journal article supplement (https://acs.figshare.com/ndownloader/files/3774544)

## Supporting Information

**Differential Effects of *Glycyrrhiza* Species on Genotoxic Estrogen Metabolism:  
Licochalcone A downregulates P450 1B1, whereas Isoliquiritigenin Stimulates It**

*Tareisha L. Dunlap, Shuai Wang, Charlotte Simmler, Shao-Nong Chen, Guido F. Pauli, Birgit  
M. Dietz, and Judy L. Bolton\**

UIC/NIH Center for Botanical Dietary Supplements Research, Department of Medicinal  
Chemistry and Pharmacognosy, 833 South Wood Street, Chicago, Illinois 60612-7231, USA

Correspondence: \*Dr. Judy L. Bolton, Department of Medicinal Chemistry and  
Pharmacognosy, University of Illinois at Chicago, 833 S. Wood Street, M/C 781, Chicago, IL,  
60612-7231; Email: Judy.Bolton@uic.edu, Phone: 312-996-5280, Fax: 312-996-7107

## Figure Legends

**Figure S1. Chemical profiles of GG, GU and GI, as measured by UHPLC-UV.** Liquiritin (1), liquiritigenin -7-O-apiosylglucoside (2), and Liquiritin apioside (3) are all LigF equivalents, which share the same core aglycone LigF structure. Isoliquiritin (5), isoliquiritin apioside (6), and licuraside (7) are all considered LigC equivalents, which share the same core aglycone LigC structure.

**Figure S2. Structures of LigC and LigF equivalents**

**Figure S3. MS fragmentation pattern of dansyl-4-MeOE<sub>1</sub>.** Representative positive ESI fragmentation mass spectra for parent ion dansyl-4-MeOE<sub>1</sub> was shown. Parent ion Q1 with m/z of 534.4 was captured and scanned for Q3 product ions formation and the most intensive product ion with m/z of 171.2 was selected to monitor in the LC-MS/MS.

**Figure S4. Representative SRM chromatograms** with transition 534.4 – 171.2 analyzing 2-MeOE<sub>1</sub> and 4-MeOE<sub>1</sub> metabolites showing improved sensitivity for A) current method compared to B) reference 9. Note enhanced signal to noise for SCIEX 5500 QTRAP and shorter run times than the previous method using the API-3000 mass spectrometer. MCF-10A cells treated with E<sub>2</sub> (1 μM) were collected and analyzed for 2-MeOE<sub>1</sub> and 4-MeOE<sub>1</sub> metabolites as described in A) Material and Methods and B) reference 9.

**Figure S5. Cytokines cooperatively induced P450 1B1 mRNA expression in MCF-10A cells.** qPCR analysis of P450 1B1 mRNA was performed after MCF-10A cells were incubated with TNF-α (10 ng/mL) or IFN-γ (10 ng/mL) and TNF-α with IFN-γ (10 ng/mL each) for 24 h.

Results are the mean  $\pm$  SEM of three independent experiments analyzed by one-way ANOVA with Dunnett's multiple comparison post-test, \* $p < 0.001$ .

**Figure S6. Effect of licorice compounds on XRE-luciferase activity.** HepG2 cells were incubated with TCDD (10 nM) or TCDD with LigF/LigC (10  $\mu$ M) for 24 h before analysis of XRE-luciferase reporter activity. Results are the mean  $\pm$  SEM analyzed by one-way ANOVA with Dunnett's multiple comparison post-test, \* $p < 0.001$ .

# Figures

Figure S1

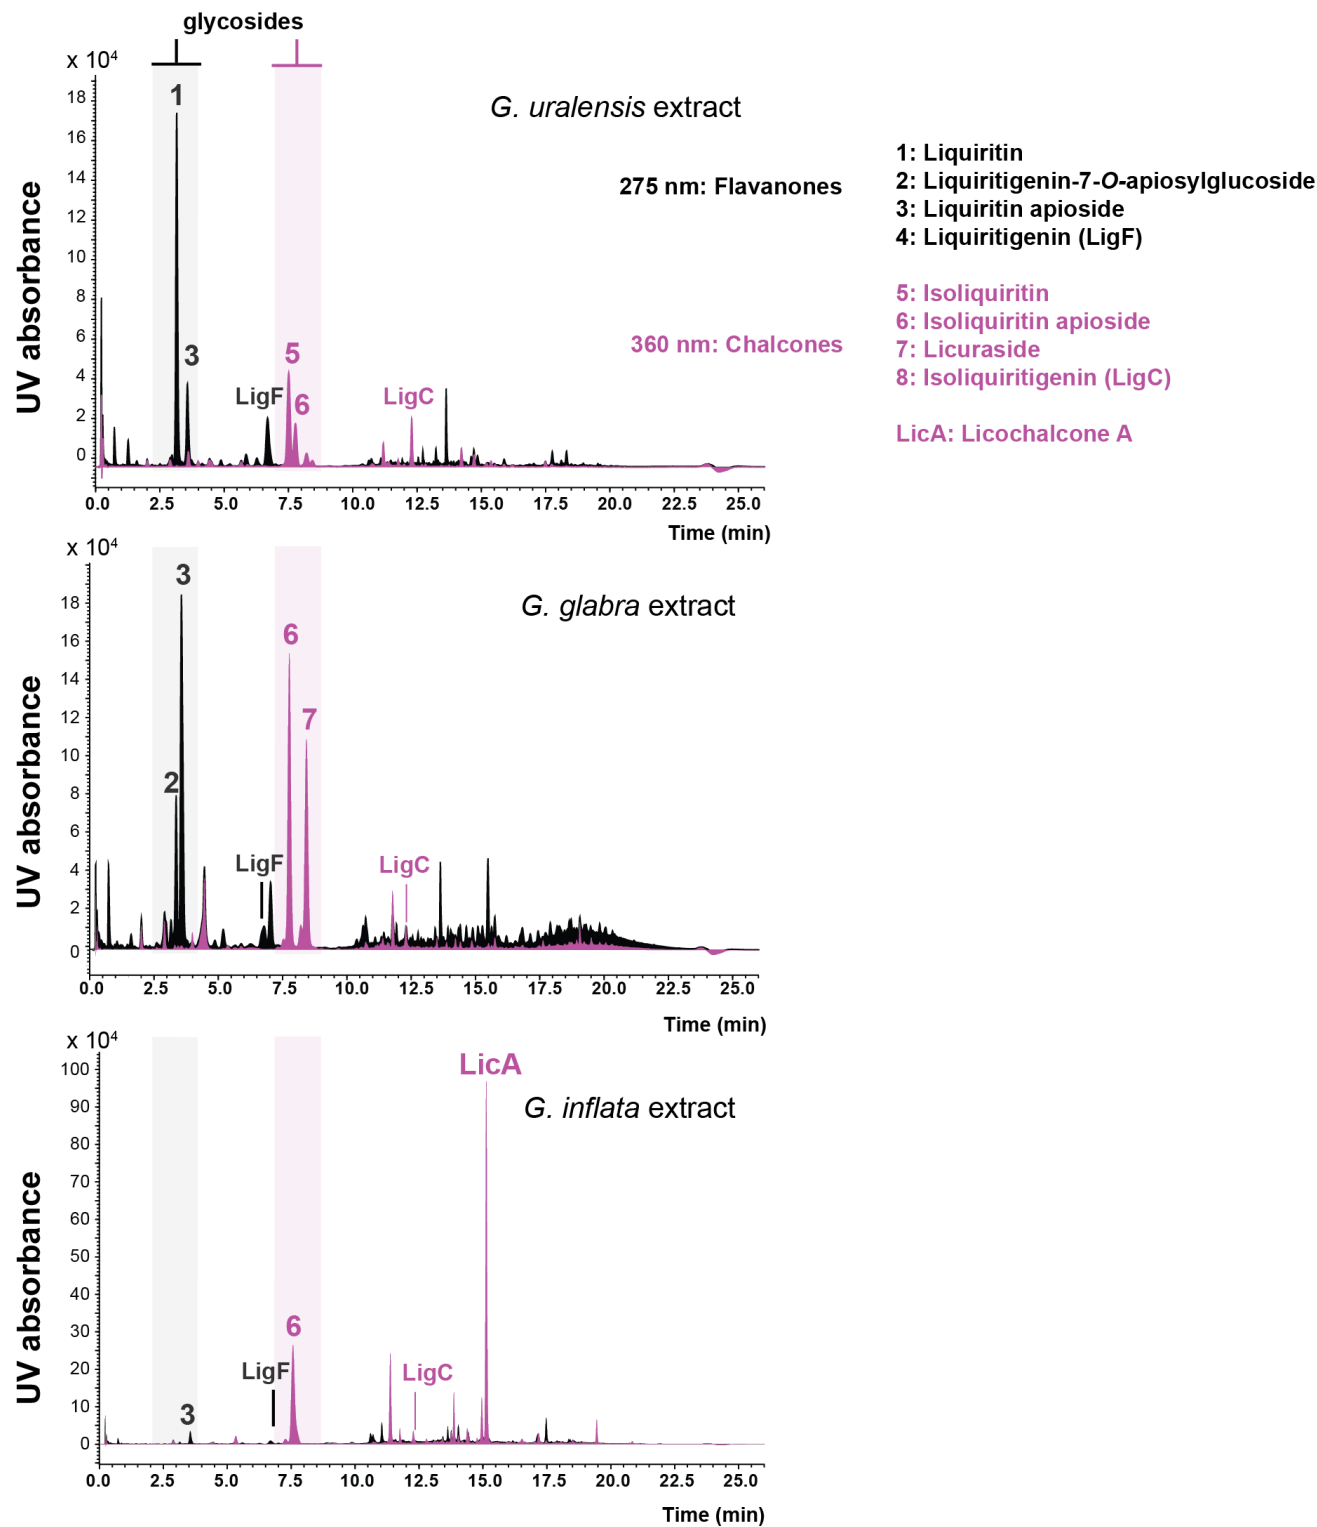

**Figure S2**

**LigF Equivalents**

|   |                                     |                                                       |                                                       |
|---|-------------------------------------|-------------------------------------------------------|-------------------------------------------------------|
| 1 | Liquiritin                          | $R_1:H$                                               | $R_2:\beta\text{-Glc}$                                |
| 3 | Liquiritin apioside                 | $R_1:H$                                               | $R_2:\beta\text{-Api}(1\rightarrow2)\beta\text{-Glc}$ |
| 2 | Liquiritigenin-7-O-Apiosylglucoside | $R_1:\beta\text{-Api}(1\rightarrow2)\beta\text{-Glc}$ | $R_2:H$                                               |
| 4 | Liquiritigenin (LigF)               | $R_1:H$                                               | $R_2:H$                                               |

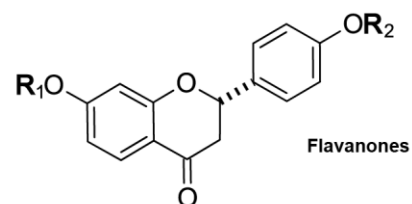

**LigC Equivalents**

|   |                          |                                                       |                                                       |
|---|--------------------------|-------------------------------------------------------|-------------------------------------------------------|
| 5 | Isoliquiritin            | $R_1:H$                                               | $R_2:\beta\text{-Glc}$                                |
| 6 | Isoliquiritin apioside   | $R_1:H$                                               | $R_2:\beta\text{-Api}(1\rightarrow2)\beta\text{-Glc}$ |
| 7 | Licuraside               | $R_1:\beta\text{-Api}(1\rightarrow2)\beta\text{-Glc}$ | $R_2:H$                                               |
| 8 | Isoliquiritigenin (LigC) | $R_1:H$                                               | $R_2:H$                                               |

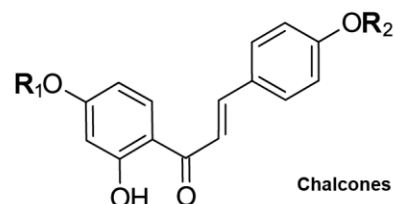

**Figure S3**

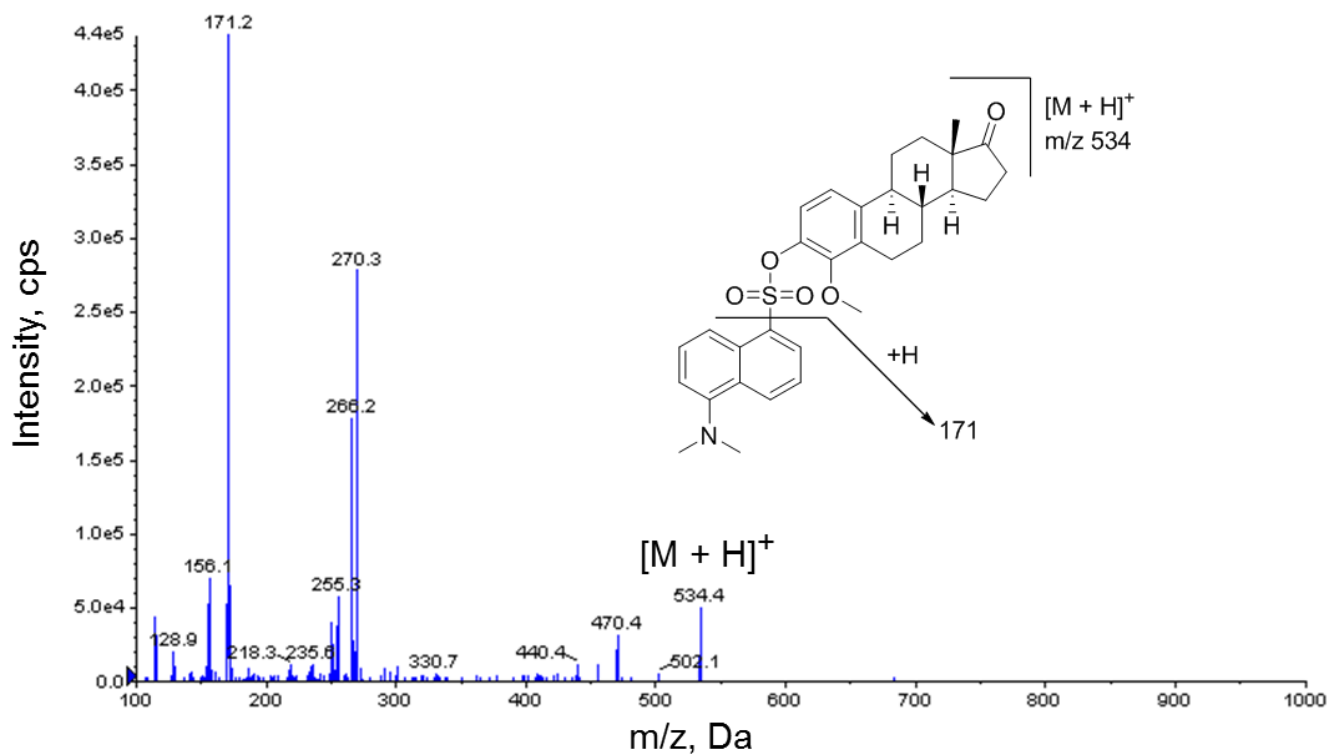

Figure S4

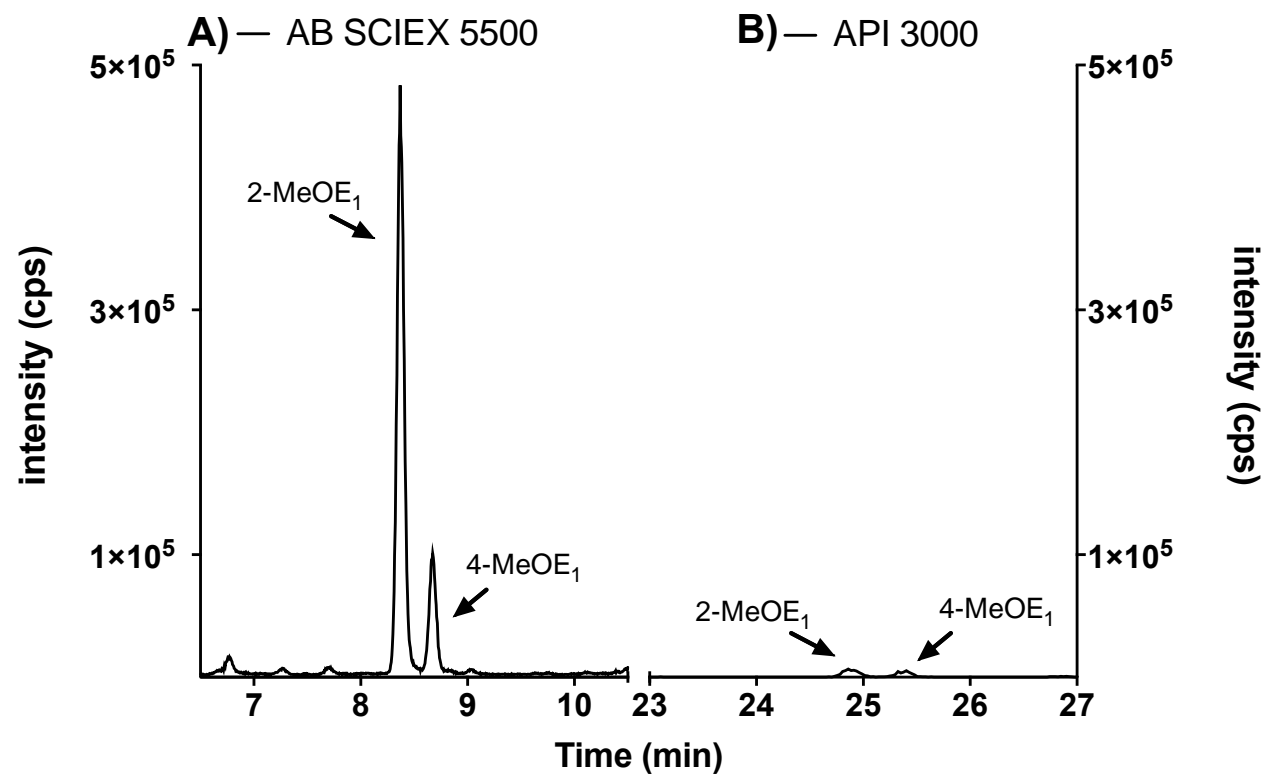

Figure S5

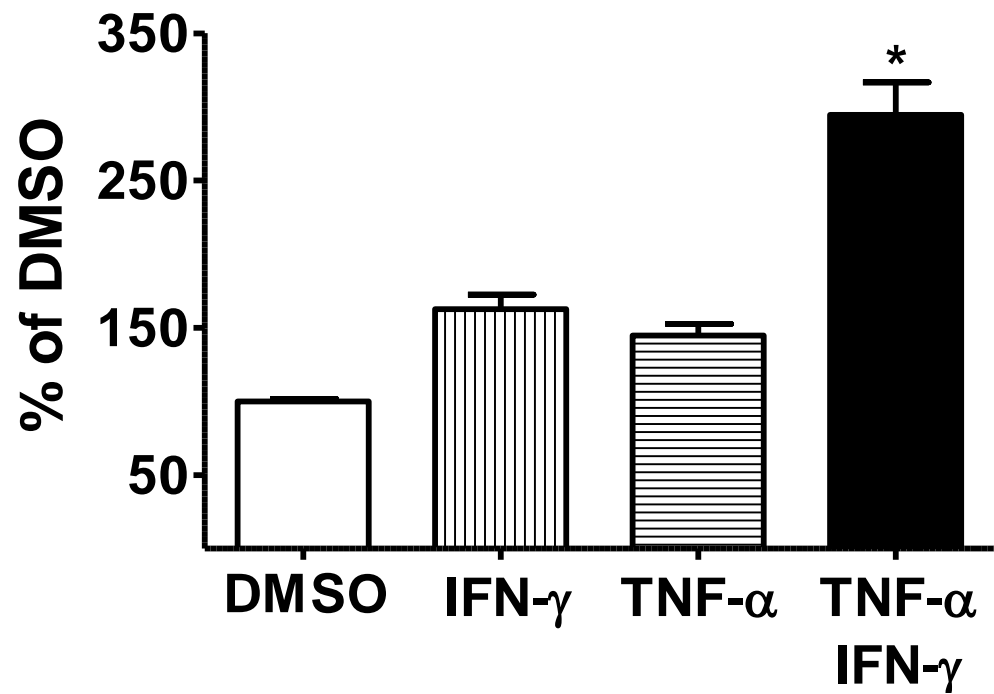

Figure S6

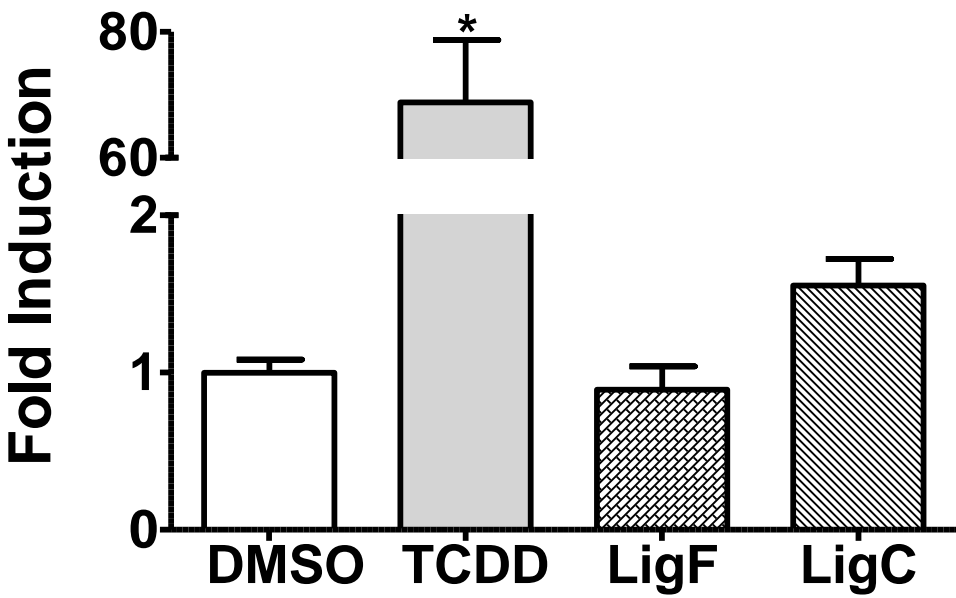

Supplement: Supplementary file 1 [file 3774544]
